# Supplementary material for: Host-Pathogen-Treatment Triad: Host Factors Matter Most in Methicillin-Resistant Staphylococcus aureus Bacteremia Outcomes
Source: PubMed Central journal article supplement (PMC5786753; doi:10.1128/aac.01902-17), 2018-01-25
Supplement: AAC.01902-17_zac002186886s1.pdf [file AAC.01902-17_zac002186886s1.pdf]

## **Supplement 1:**

### **Pulsed field gel electrophoresis (PFGE).**

Isolates were embedded in agarose plugs and lysed in situ, and genomic DNA was digested with SmaI restriction endonuclease (New England Biolabs, Beverly, MA). The restriction fragments were resolved into a pattern of discrete bands in a 1% SeaKem Gold agarose gel by switching the current direction starting at 2 seconds and finishing at 40 seconds, using a linear ramping factor and a total run time of 16.5 hours. DNA fragment patterns were visualized by ethidium bromide staining and analyzed using the GelCompar II V3.0 imaging software.

### **Panton-Valentine leukocidin (PVL) expression:**

Oligonucleotide primers have been designed to amplify a region spanning the last section of lukS-PV and the beginning adjacent portion of lukF-PV<sup>4</sup> (5'-GCTGGACAAAACCTTCTTGGGAATAT-3' and 5'-GATAGGACACCAATAAATTCTGGATTG-3'; correspond to positions 2666-2690 and 2749-2723 of the PVL sequence, respectively). PCR amplification (25 µl) contained 0.25 ng of DNA, 500 nM each forward and reverse primer, 12.5 ml iQ™ SYBR green Supermix (Biorad), and 9.5 ml sterile water. Reactions are initiated at 95°C for 10 minutes; followed by 35 cycles of 30 seconds at 95°C and 2 minutes at 60°C. Melt curve analysis were used to confirm presence of a single product. All samples were tested in triplicate and results for each run averaged. PVL-positive and PVL-negative *S. aureus* isolates (MW2 and CCUG 35601, respectively) were analyzed as controls in each amplification run.

Individual isolates were cultured in tryptic soy broth (TSB) for 2 hours at 37°C with mixing. Zirconia beads and a BeadBeater-type homogenizer (BioSpec, Bartlesville, Oklahoma, USA) were used to extract DNA from bacterial pellets resuspended in 10 mM Tris, pH 8.0, 1 mM EDTA. DNA from each isolate was amplified by qPCR using primers and probes corresponding to variable regions of *agrC* specific for each *agr* group. Each amplification assay included known *agr* group internal controls.

### **Accessory gene regulator (*agr*) typing by PCR.**

Accessory gene regulator (*agr*) function was semi-quantitatively assessed using a δ-

hemolysis assay as previously described.<sup>6</sup> Individual isolates were streaked outwardly from a beta-lysin disk (Remel, Lenexa, KS) that was placed on a Muller-Hinton Agar (MHA) with 5% sheep blood agar plate. Plates were incubated at 37°C for 24 hours and read independently by two investigators.  $\delta$ -hemolysin was considered present if there was an observed synergistic hemolysis within the zone of overlap between the beta-lysin hemolysis from the disk and the  $\delta$ -hemolysin from the test strain. Such observed hemolysis was interpreted as presence of *agr* function. Strains RN6607 and RN9120 were utilized as positive and negative controls, respectively.

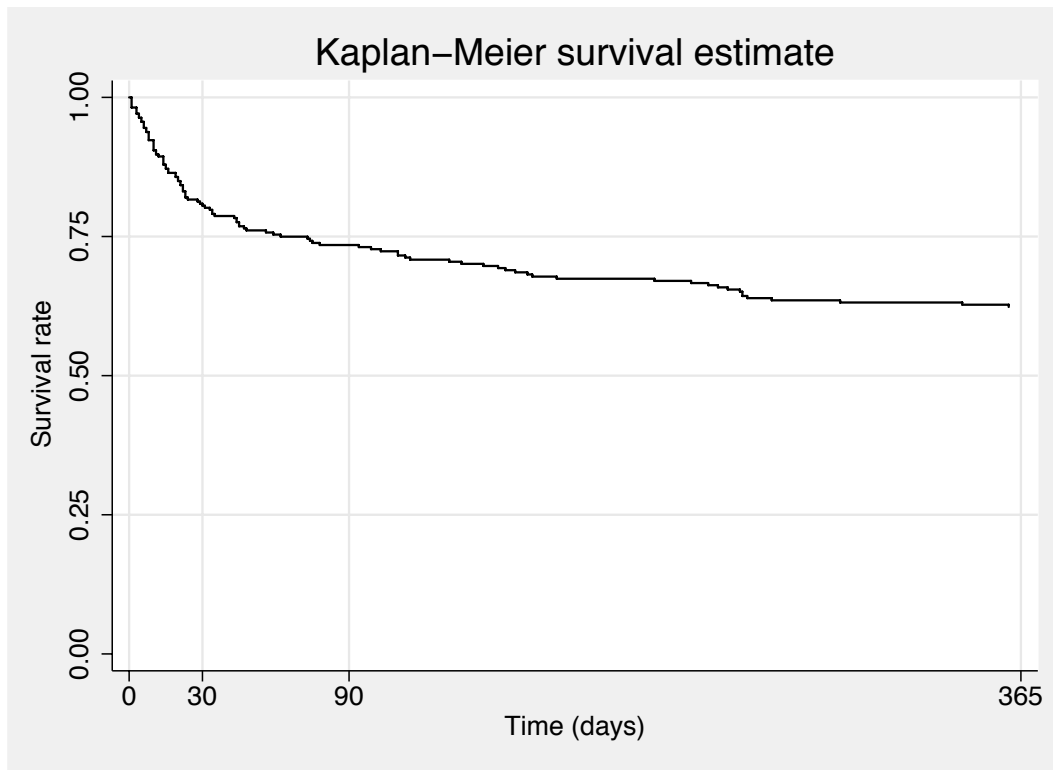

Supplementary Figure 1. Kaplan Meier survival curve for the first 1 year.

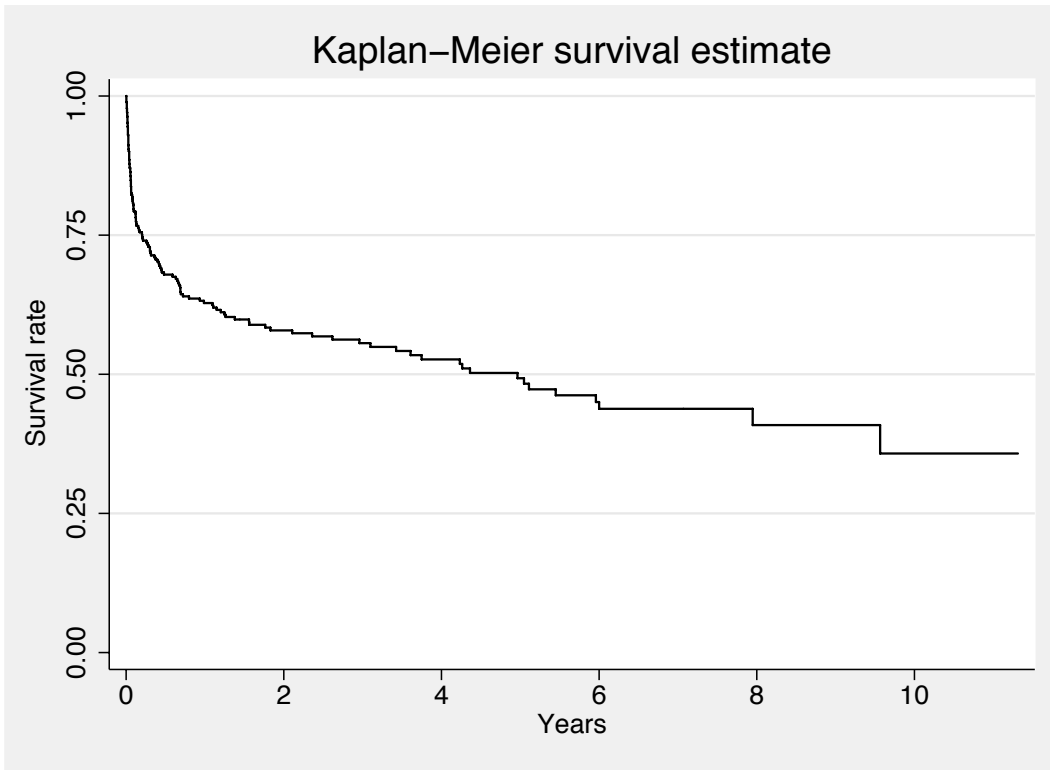

Supplementary Figure 2. Kaplan Meier survival curve for the follow up period.
